# Supplementary material
Source: PubMed Central journal article supplement (PMC3446828)
Supplement: ismej201238x1.pdf [file ismej201238x1.pdf]

**Figure S1**

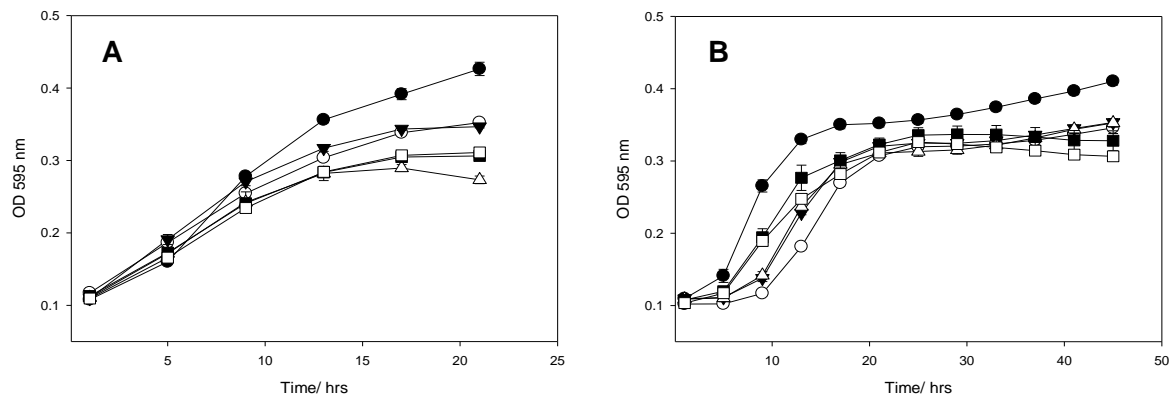

**Fig. S1:** Growth of WT MKH13 (● closed circle), MKH13::pCI372-*galE*(3), (○ open circle), MKH13::pCI372-*murB*(3), (△ open triangle), MKH13::pCI372-*mazG*(3), (▼ closed triangle), MKH13::pCI372-*galE*(25), (■ closed square) and MKH13::pCI372-*mazG*(5), (□ open square) in **(A)** LB supplemented with 20% glycerol, **(B)** LB broth supplemented with 30% sucrose.
