# Supplementary material
Source: PubMed Central journal article supplement (PMC3446828)
Supplement: ismej201238x2.pdf [file ismej201238x2.pdf]

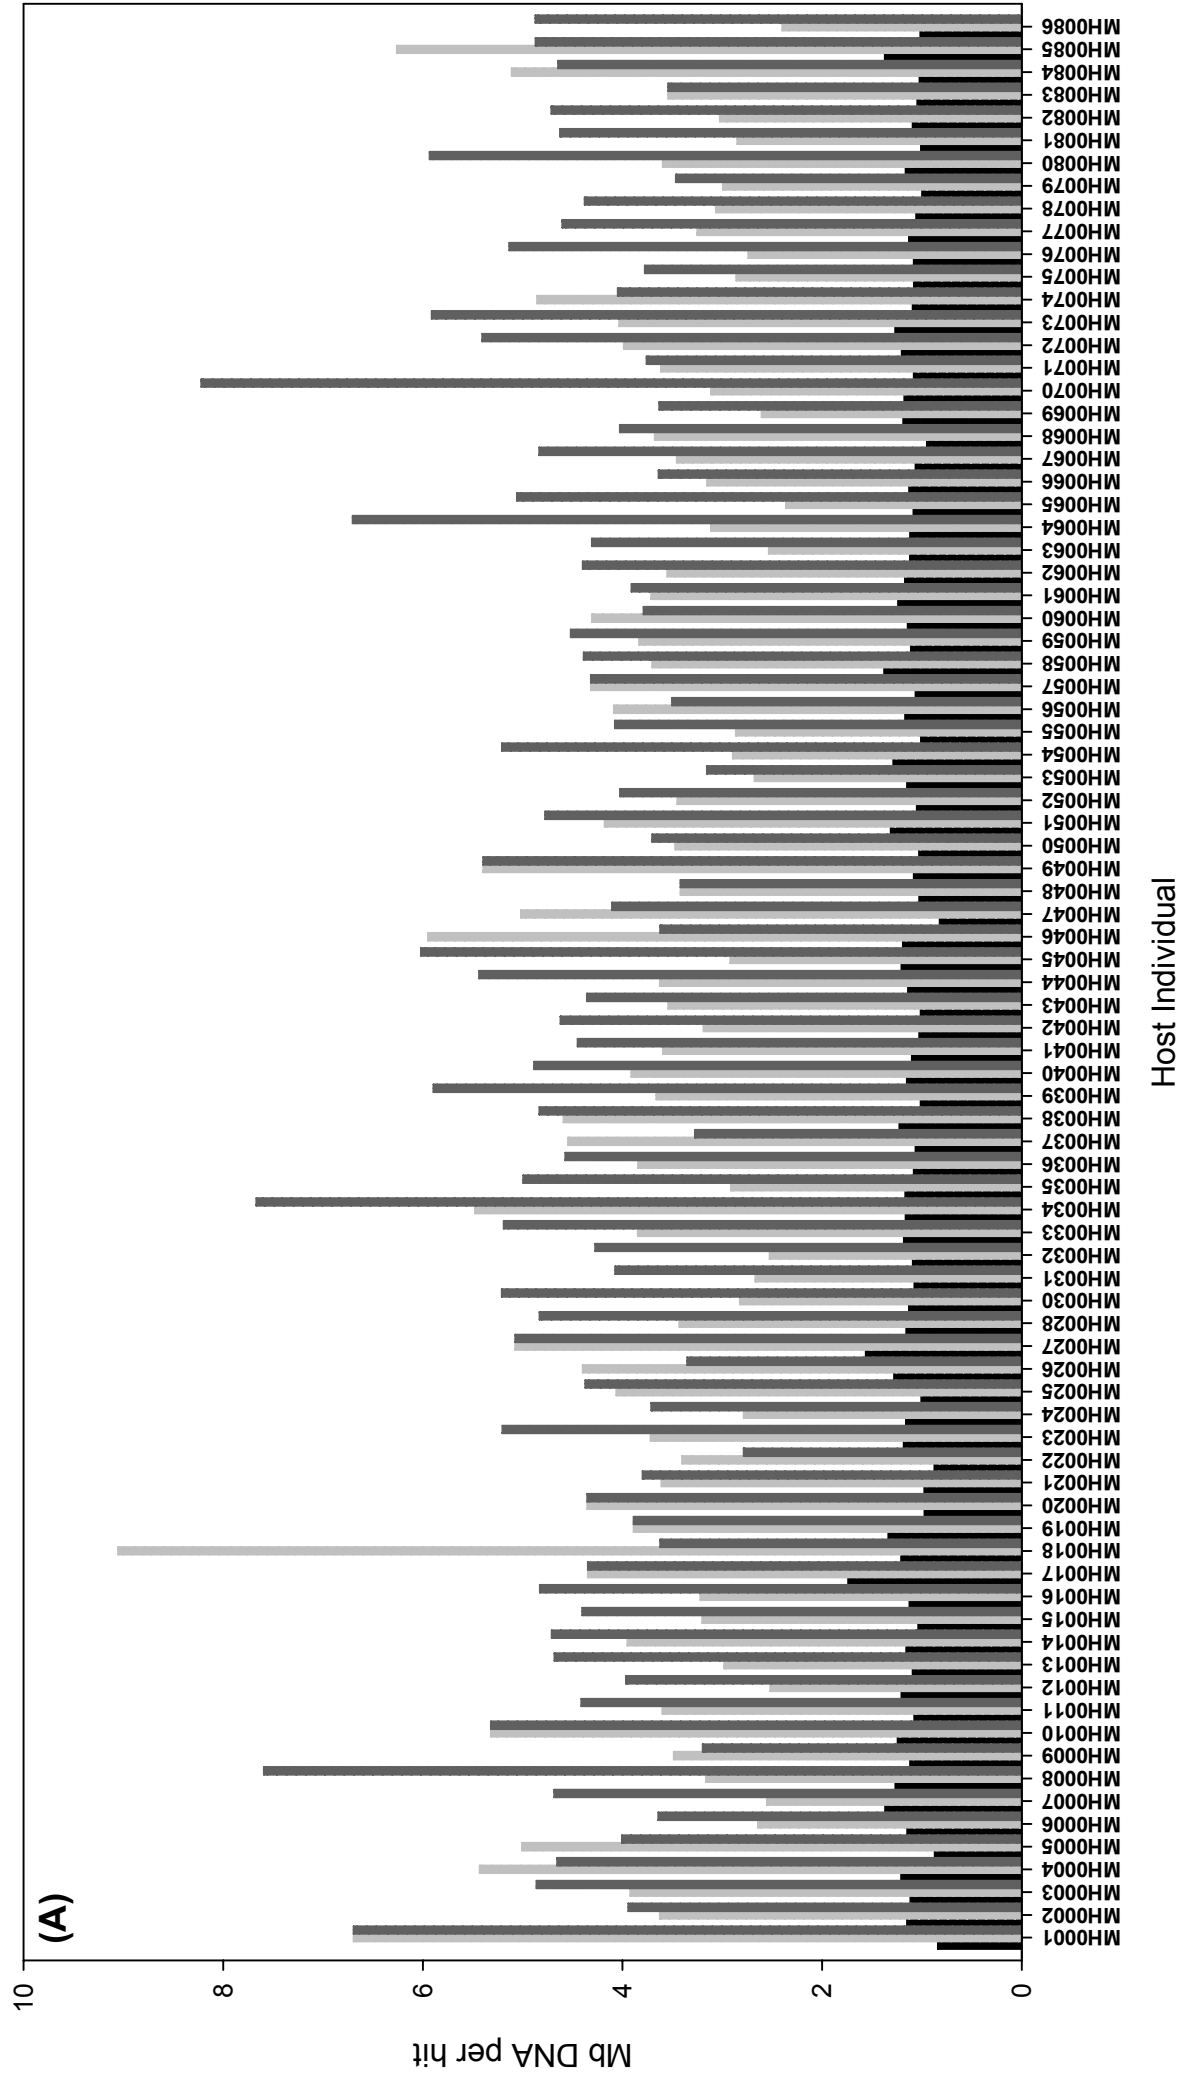

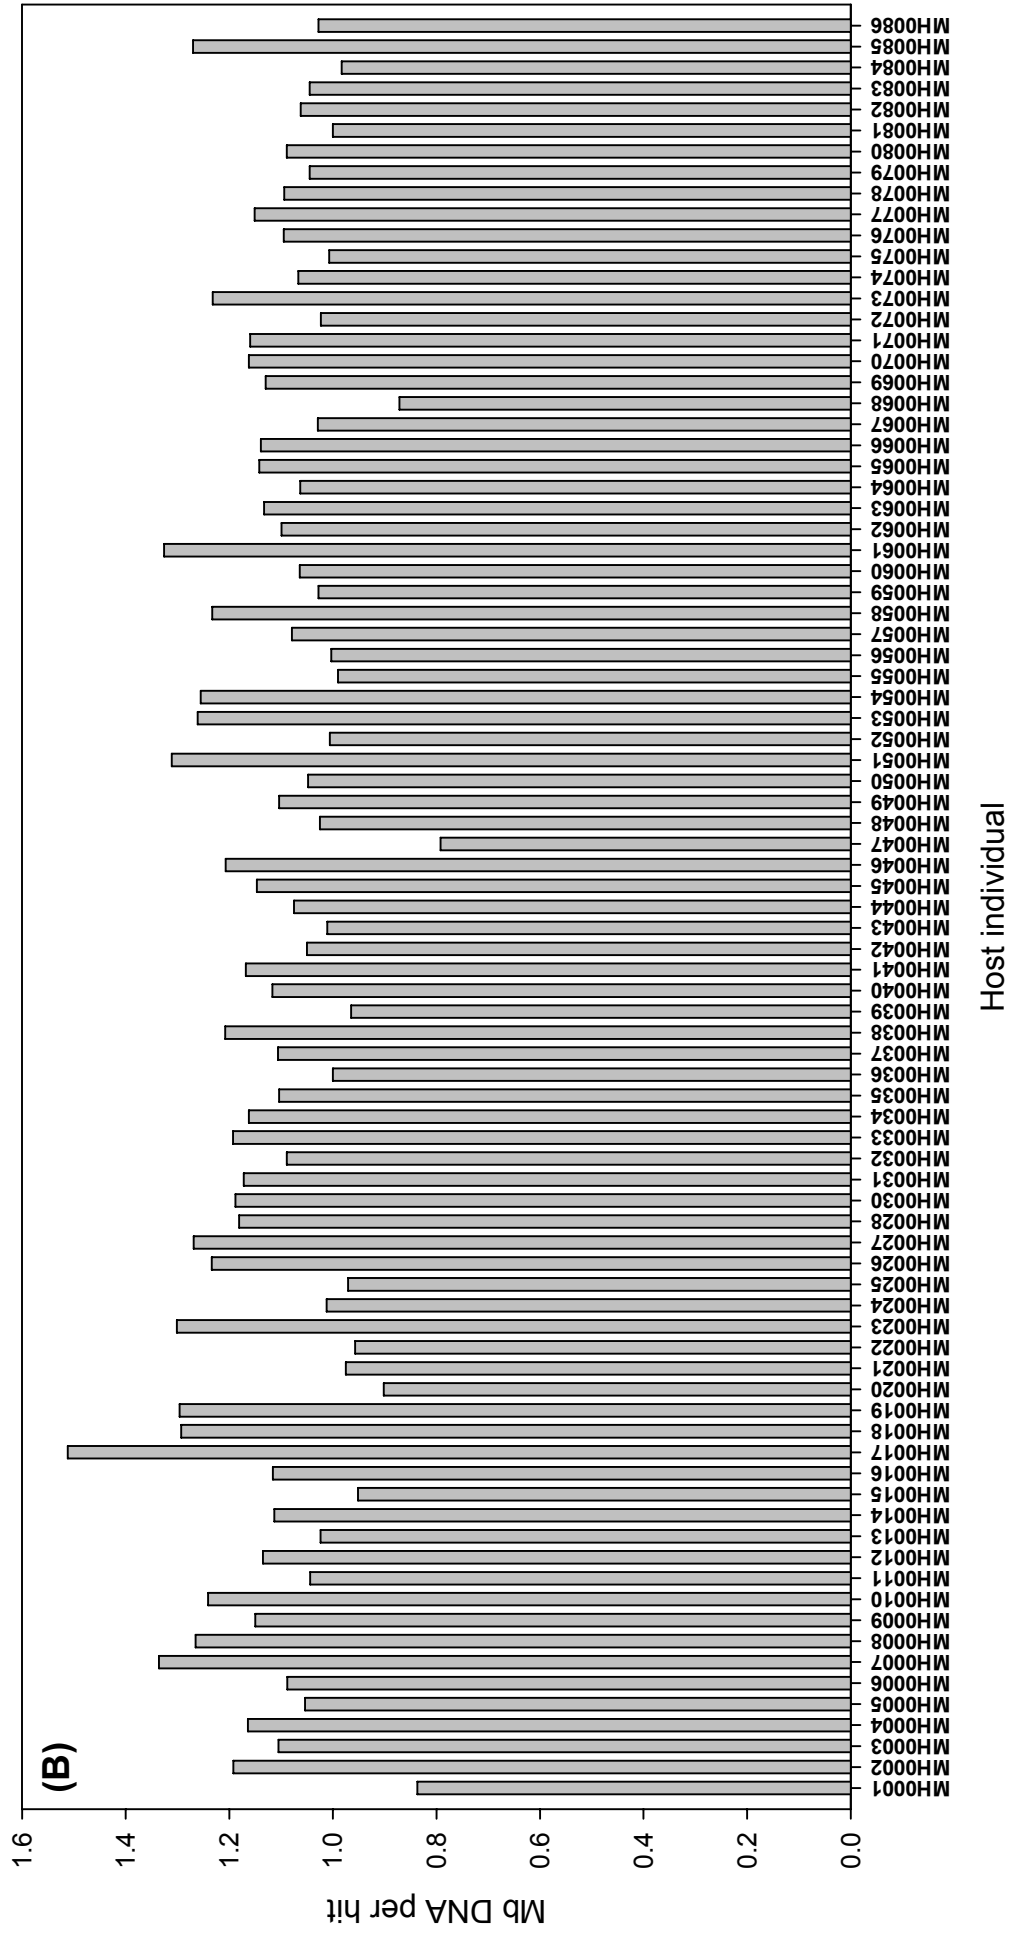

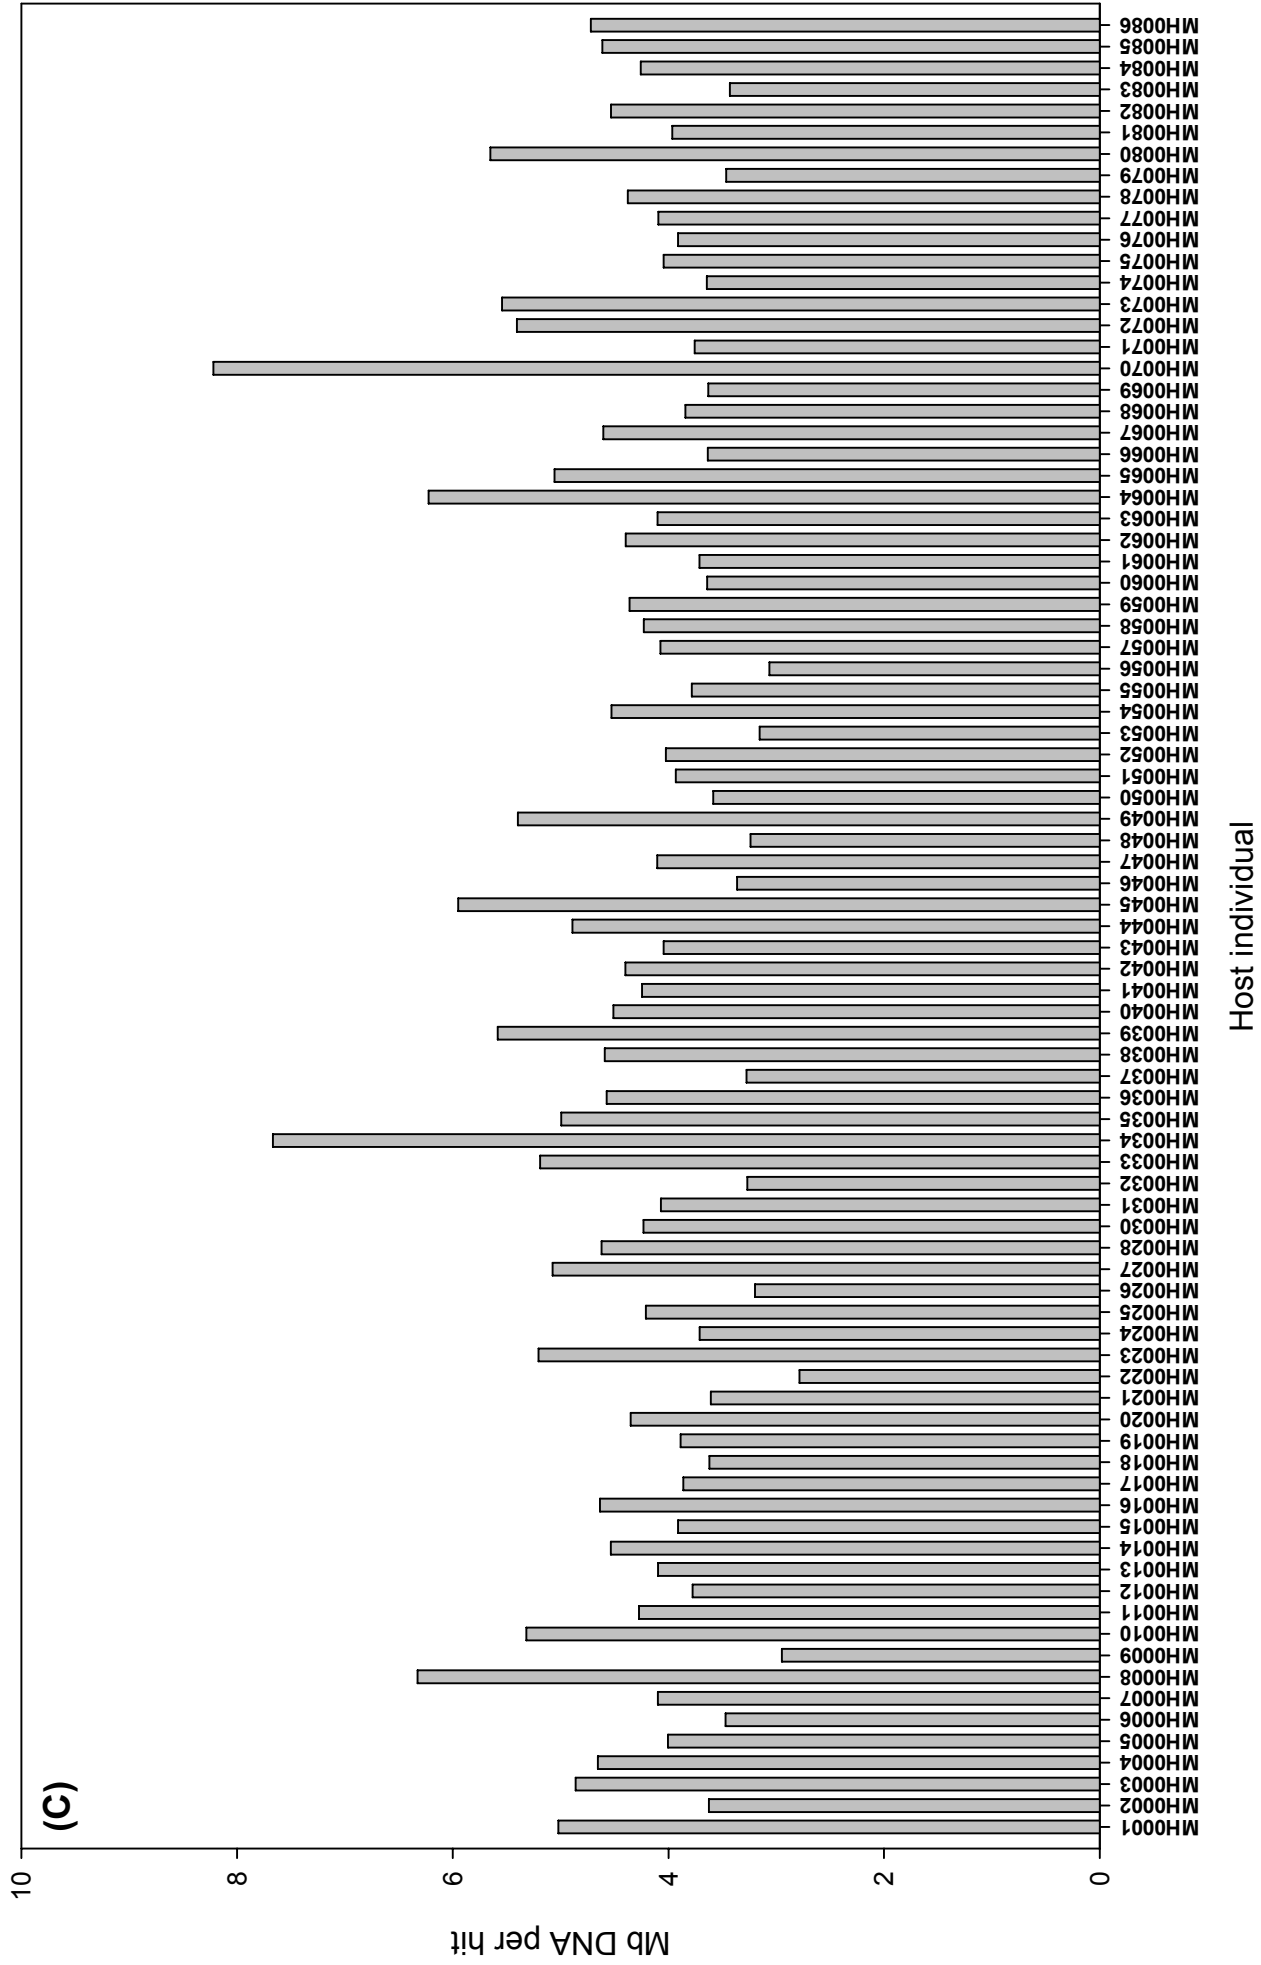

**Fig. S2:** Relative abundance of the identified genes identified in this study when BLASTed against the healthy individuals in the MetaHit dataset. **(A)** *galE(3)* = black; *murB(3)* = light grey; *galE(25)* = dark grey; **(B)** *galE(25)* and **(C)** *mazG(5)*.
