# Supplementary material
Source: PubMed Central journal article supplement (PMC3446828)
Supplement: ismej201238x3.pdf [file ismej201238x3.pdf]

(A)

### COLAER\_01955

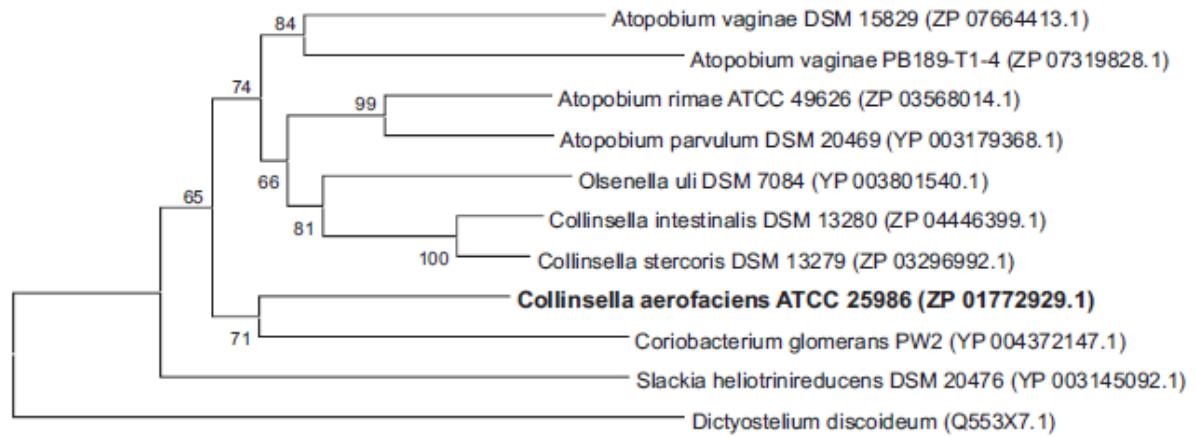

0.05

### COLAER\_01957

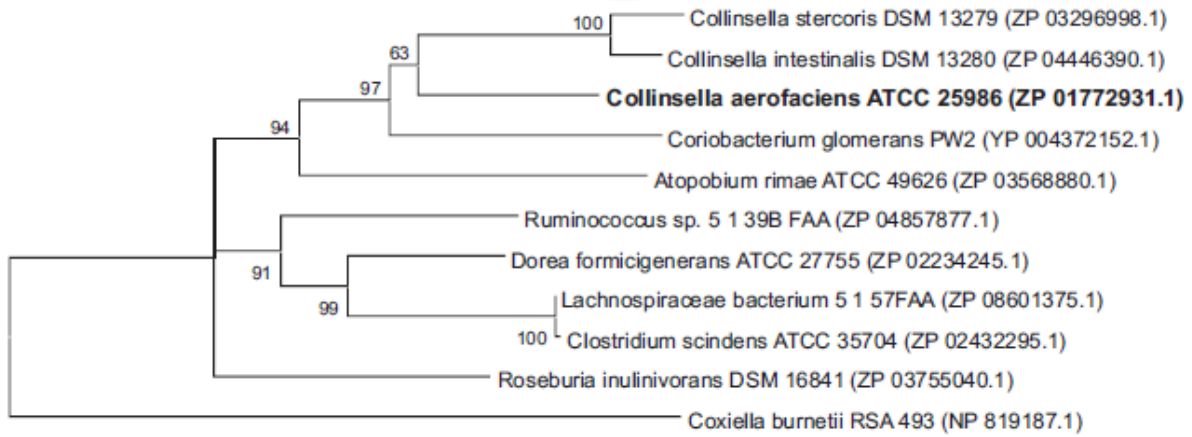

0.1

### COLAER\_01981

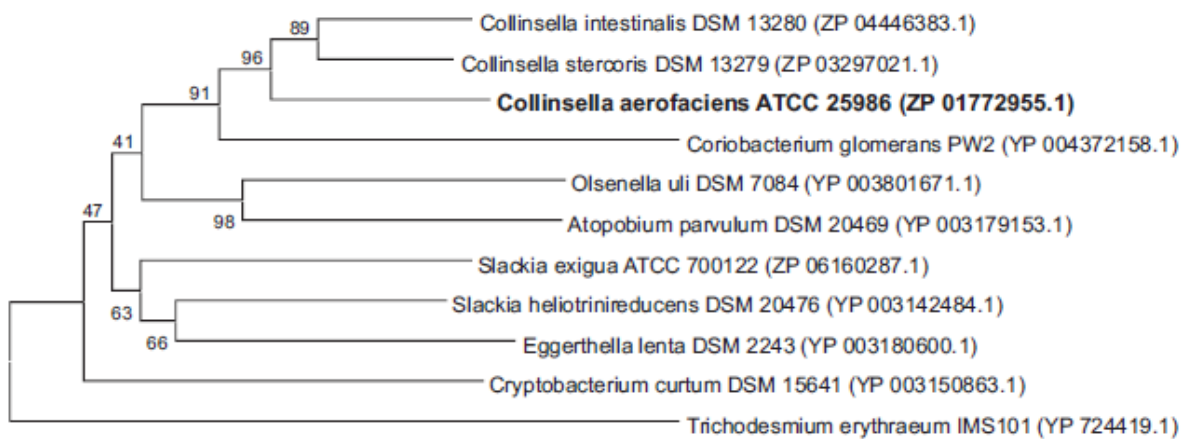

0.1

(B)

**GalE(25)**

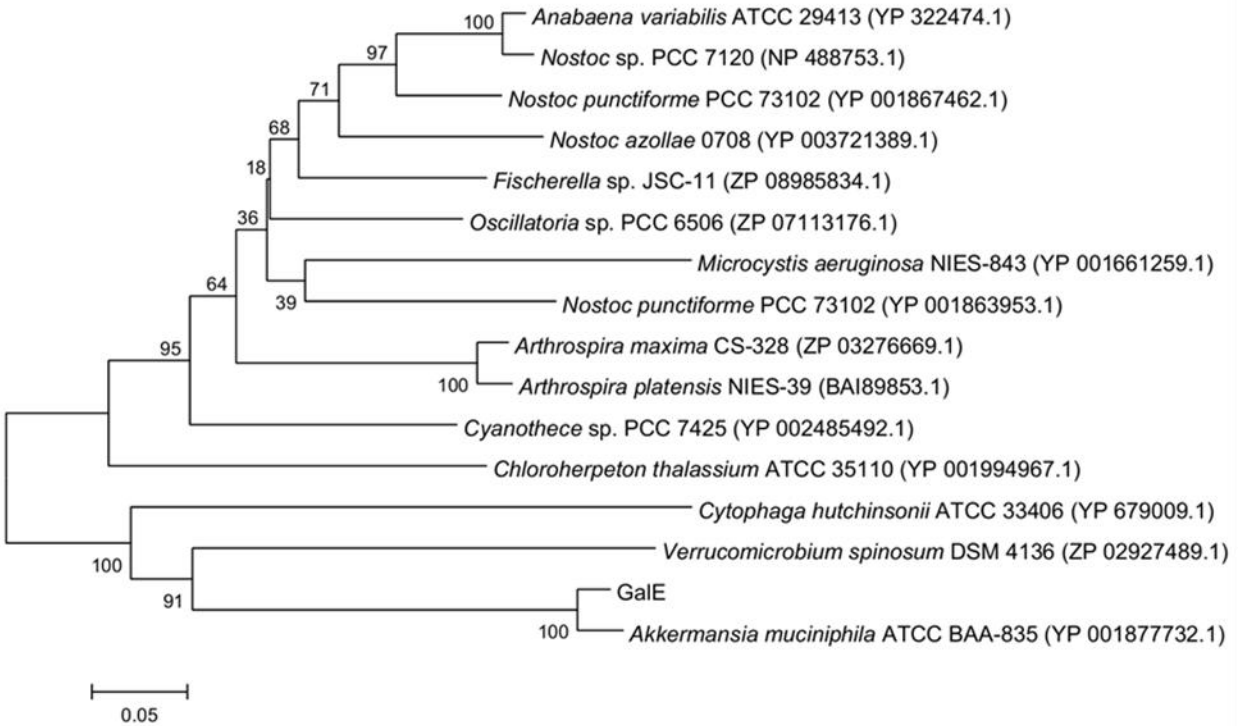

(C)

**MazG(5)**

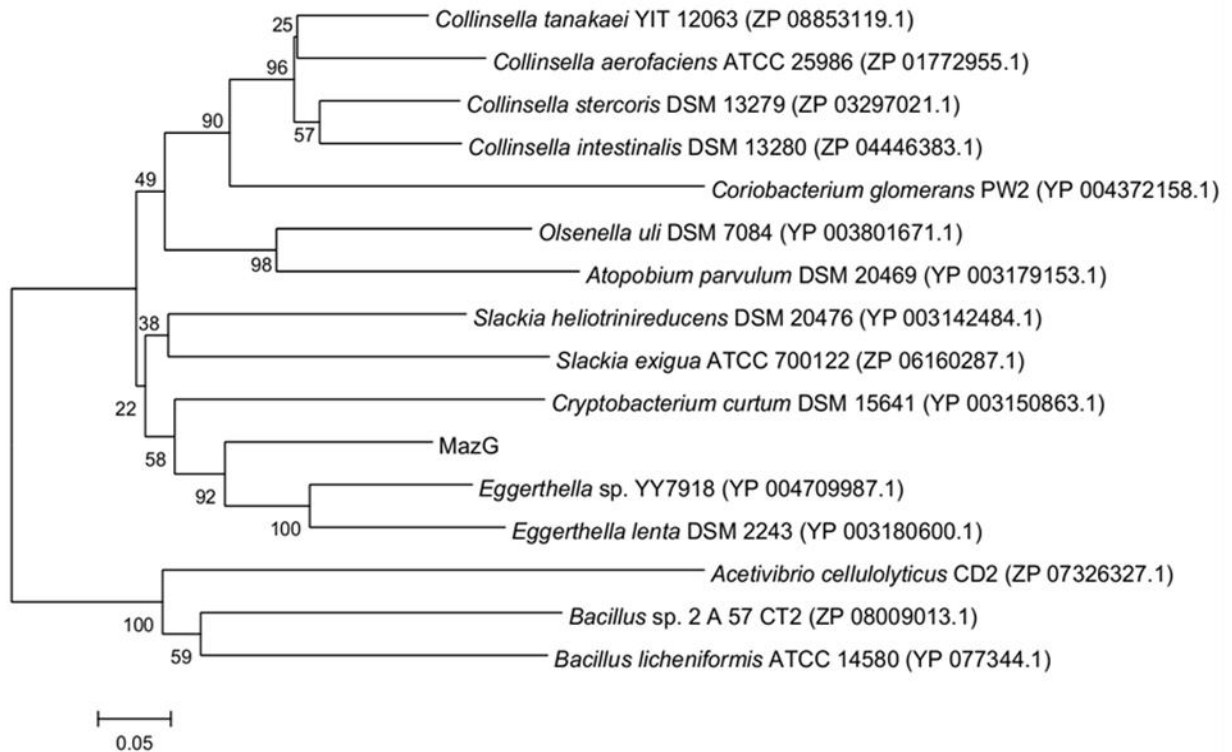

**Fig. S3:** Phylogenetic analysis of **(A)** GalE(3) (COLAER\_01955), MurB(3) (COLAER\_01957), MazG(3) (COLAER\_01981), **(B)** GalE(25) (Amuc\_1125) and **(C)** MazG(5) (EGYY\_03530) and related proteins. Phylogenetic analysis was performed using the program MEGA 5.0 (Tamura *et al.*, 2011). The bootstrap method (500 replicates) was used to test the percentage of replicate trees in which the associated taxa clustered together
