# Supplementary material
Source: PubMed Central journal article supplement (PMC3446828)
Supplement: ismej201238x4.pdf [file ismej201238x4.pdf]

**Table S1. End sequencing of SMG clones**

| Clone  | Best hit microorganism                                       | Top blastx hit                                         | e-value   | % coverage | % identity | Phylum             |
|--------|--------------------------------------------------------------|--------------------------------------------------------|-----------|------------|------------|--------------------|
| SMG 1  | <i>Bacteroides thetaiotamicron</i> VPI-5482                  | Hypothetical protein BT_1366                           | 0.00E+00  | 100%       | 100%       | Bacteroidetes      |
| SMG 2  | <i>Collinsella aerofaciens</i> ATCC 25986                    | Hypothetical protein COLAER_01951                      | 1.00E-133 | 99%        | 96%        | Actinobacteria     |
| SMG 3  | <i>Collinsella aerofaciens</i> ATCC 25986                    | Hypothetical protein COLAER_01951                      | 2.00E-146 | 99%        | 88%        | Actinobacteria     |
| SMG 4  | <i>Collinsella aerofaciens</i> ATCC 25986                    | Hypothetical protein COLAER_01951                      | 2.00E-41  | 99%        | 95%        | Actinobacteria     |
| SMG 5  | <i>Eggerthella</i> sp. YY7918                                | Aldehyde ferredoxin oxidoreductase                     | 6.00E-120 | 99%        | 42%        | Actinobacteria     |
| SMG 6  | <i>Bacteroides thetaiotamicron</i> VPI-5482                  | Hypothetical protein BT_1366                           | 0.00E+00  | 100%       | 100%       | Bacteroidetes      |
| SMG 7  | <i>Bacteroides</i> sp. 4_3_47FAA                             | Two-component system; response regulator sensor kinase | 1.00E-135 | 83%        | 98%        | Bacteroidetes      |
| SMG 8  | <i>Bacteroides</i> sp. 3_1_40A                               | Hypothetical protein HMPREF9011_03915                  | 3.00E-160 | 99%        | 99%        | Bacteroidetes      |
| SMG 9  | <i>Alistipes putredinis</i> DSM 17216                        | Hypothetical protein ALIPUT_02368                      | 0.00E+00  | 47%        | 72%        | Bacteroidetes      |
| SMG 10 | <i>Paraprevotella xylaniphila</i> YIT 11841                  | Helicase protein                                       | 8.00E-143 | 99%        | 99%        | Bacteroidetes      |
| SMG 11 | <i>Bacteroides</i> sp. 3_1_40A                               | Dipeptidyl aminopeptidase                              | 0.00E+00  | 99%        | 99%        | Bacteroidetes      |
| SMG 12 | <i>Collinsella aerofaciens</i> ATCC 25986                    | Hypothetical protein COLAER_01951                      | 6.00E-48  | 92%        | 98%        | Actinobacteria     |
| SMG 13 | <i>Bacteroides stercoris</i> ATCC 43183                      | Hypothetical protein BACSTE_02336                      | 5.00E-80  | 91%        | 64%        | Bacteroidetes      |
| SMG 14 | <i>Bacteroides</i> sp. D2                                    | TonB-dependent receptor                                | 1.00E-65  | 99%        | 55%        | Bacteroidetes      |
| SMG 15 | n/a                                                          | No sequence data                                       | n/a       | n/a        | n/a        | n/a                |
| SMG 16 | <i>Pseudomonas syringae</i> pv. <i>aceris</i> str. M302273PT | Phage integrase, putative                              | 7.00E-31  | 69%        | 47%        | Proteobacteria (γ) |
| SMG 17 | <i>Pseudomonas syringae</i> pv. <i>aceris</i> str. M302273PT | Phage integrase, putative                              | 1.00E-32  | 50%        | 51%        | Proteobacteria (γ) |
| SMG 18 | n/a                                                          | No sequence data                                       | n/a       | n/a        | n/a        | n/a                |
| SMG 19 | <i>Prevotella copri</i> DSM 18205                            | Putative Tat pathway signal sequence                   | 2.00E-26  | 59%        | 52%        | Bacteroidetes      |
| SMG 20 | <i>Slackia heliotrinireducens</i> DSM 20476                  | Fe-S oxidoreductase, coproporphyrinogen III oxidase    | 2.00E-18  | 22%        | 70%        | Actinobacteria     |

|        |                                                     |                                                                          |           |      |      |                    |
|--------|-----------------------------------------------------|--------------------------------------------------------------------------|-----------|------|------|--------------------|
| SMG 21 | <i>Bacteroides caccae</i> ATCC 43185                | Hypothetical protein BACCAC_01367                                        | 1.00E-126 | 58%  | 98%  | Bacteroidetes      |
| SMG 22 | <i>Prevotella oulorum</i> F0390                     | Hypothetical protein HMPREF9431_01698                                    | 7.00E-61  | 58%  | 65%  | Bacteroidetes      |
| SMG 23 | <i>Clostridium methylpentosum</i> DSM 5476          | Hypothetical protein CLOSTMETH_00476                                     | 8.00E-19  | 97%  | 23%  | Firmicutes         |
| SMG 24 | <i>Bacteroides eggerthii</i> 1_2_48FAA              | TonB-dependent receptor                                                  | 3.00E-123 | 100% | 54%  | Bacteroidetes      |
| SMG 25 | <i>Akkermansia muciniphila</i> ATCC BAA-835         | DNA polymerase III, alpha subunit Amuc_0374                              | 0.00E+00  | 99%  | 95%  | Verrucomicrobia    |
| SMG 26 | <i>Bacteroides fragilis</i> 3_1_12                  | Excinuclease ABC subunit B                                               | 1.00E-34  | 73%  | 82%  | Bacteroidetes      |
| SMG 27 | <i>Alistipes</i> sp. HGB 7                          | Glycosyl hydrolase, family 57                                            | 0.00E+00  | 97%  | 95%  | Bacteroidetes      |
| SMG 28 | <i>Pseudomonas fluorescens</i> Pf-5                 | Efflux; ABC transporter ATP-binding protein                              | 1.00E-72  | 79%  | 53%  | Proteobacteria (γ) |
| SMG 29 | Uncultured rumen bacterium                          | Beta-D-xylosidase/alpha-L-arabinosidase                                  | 1.00E-90  | 82%  | 66%  | Bacteroidetes      |
| SMG 30 | <i>Bacteroides caccae</i> ATCC 43185                | Hypothetical protein BACCAC_01367                                        | 2.00E-90  | 59%  | 98%  | Bacteroidetes      |
| SMG 31 | n/a                                                 | No sequence data                                                         | n/a       | n/a  | n/a  | n/a                |
| SMG 32 | <i>Lacinutrix</i> sp. 5H-3-7-4                      | Primosomal protein N'                                                    | 9.00E-74  | 92%  | 44%  | Bacteroidetes      |
| SMG 33 | <i>Capnocytophaga</i> sp. oral taxon 329 str. F0087 | RND transporter, HAE1/HME family, permease protein                       | 6.00E-84  | 98%  | 47%  | Bacteroidetes      |
| SMG 34 | <i>Bacterium Ellin514</i>                           | Antibiotic biosynthesis monooxygenase                                    | 8.00E-41  | 54%  | 40%  | Verrucomicrobia    |
| SMG 35 | <i>Alistipes</i> sp. HGB5                           | Transporter; major facilitator family protein (sugar phosphate permease) | 9.00E-67  | 73%  | 56%  | Bacteroidetes      |
| SMG 36 | <i>Bacteroides coprosuis</i> DSM 18011              | Hypothetical protein Bcop_0579                                           | 5.00E-69  | 99%  | 48%  | Bacteroidetes      |
| SMG 37 | <i>Pseudomonas fluorescens</i> SBW25                | Putative integrase                                                       | 1.00E-60  | 66%  | 61%  | Proteobacteria (γ) |
| SMG 38 | <i>Prevotella buccae</i> D17                        | Glycine dehydrogenase (decarboxylating), subunit 2                       | 1.00E-57  | 35%  | 75%  | Bacteroidetes      |
| SMG 39 | <i>Bacteroides</i> sp. 4_3_47FAA                    | Dipeptidyl peptidase IV                                                  | 0.00E+00  | 99%  | 98%  | Bacteroidetes      |
| SMG 40 | <i>Oxalobacter formigenes</i> OXCC13                | Conserved hypothetical protein                                           | 3.00E-130 | 81%  | 79%  | Proteobacteria (β) |
| SMG 41 | <i>Alistipes</i> sp. HGB5                           | 3-dehydroquinate dehydratase, type II                                    | 2.00E-16  | 45%  | 78%  | Bacteroidetes      |
| SMG 42 | <i>Bacteroides</i> sp. 9_1_42FAA                    | V-type ATP synthase subunit E                                            | 2.00E-128 | 53%  | 100% | Bacteroidetes      |
| SMG 43 | <i>Eubacterium rectale</i> DSM 17629                | RecA-family ATPase                                                       | 3.00E-131 | 88%  | 99%  | Firmicutes         |
| SMG 44 | n/a                                                 | No sequence data                                                         | n/a       | n/a  | n/a  | n/a                |

|        |                                             |                                              |           |      |      |                    |
|--------|---------------------------------------------|----------------------------------------------|-----------|------|------|--------------------|
| SMG 45 | <i>Blastocystis hominis</i>                 | Unnamed protein product                      | 4.00E-17  | 91%  | 47%  | Heterokontophyta   |
| SMG 46 | <i>Akkermansia muciniphila</i> ATCC BAA-835 | Hypothetical protein Amuc_0150               | 7.00E-25  | 66%  | 36%  | Verrucomicrobia    |
| SMG 47 | <i>Pseudomonas fluorescens</i> Pf0-1        | GCN5-like N-acetyltransferase                | 2.00E-82  | 48%  | 81%  | Proteobacteria (γ) |
| SMG 48 | Unidentified                                | No significant similarity                    | n/a       | n/a  | n/a  | n/a                |
| SMG 49 | <i>Bacteroides ovatus</i> SD CMC 3f         | Conserved hypothetical protein               | 7.00E-94  | 98%  | 48%  | Bacteroidetes      |
| SMG 50 | <i>Alistipes</i> sp. HGB5                   | Putative membrane protein                    | 7.00E-45  | 52%  | 90%  | Bacteroidetes      |
| SMG 51 | <i>Akkermansia muciniphila</i> ATCC BAA-835 | Small multidrug resistance protein Amuc_0621 | 3.00E-39  | 32%  | 88%  | Verrucomicrobia    |
| SMG 52 | <i>Bacteroides thetaiotamicron</i> VPI-5482 | Hypothetical protein (BT_1366)               | 0.00E+00  | 100% | 100% | Bacteroidetes      |
| SMG 53 | <i>Bifidobacterium bifidum</i> PRL2010      | TrpS Tryptophanyl-tRNA synthetase            | 1.00E-118 | 100% | 99%  | Actinobacteria     |
